# Supplementary material for: Influence of Root System Characteristics on Black Spruce Seedling Responses to Limiting Conditions
Source: MDPI journal article supplement (doi:10.3390/plants8030070), 2019-03-19
Supplement: s1 [file s1]

Supplementary data

**Figure S1.** Mean foliar nutrient concentration of black spruce seedlings: (A) P, phosphorus, (B) K, potassium, (C) Ca, calcium according irrigation (25% or 100% water field capacity) × fertilization (F- without, F+ with fertilization). Bars with the same letter indicate a non-significant difference at  $P \leq 0.05$ .

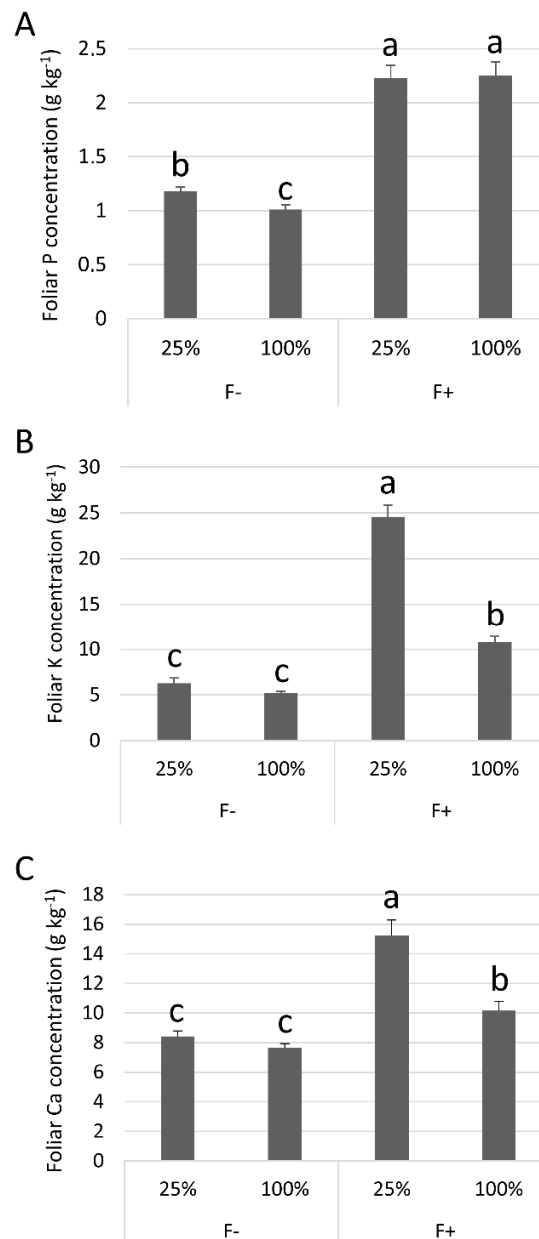

**Figure S2.** Number of initial and adventitious roots with cortical cells collapsed or not for seedlings irrigated at 25% field capacity. C: containerized seedlings (with a restricted initial root system) and DP: deeply-planted containerized seedlings (with initial and adventitious roots restricted in a root plug).

|             |                    | Number of roots<br>with collapsed<br>cortical cells | Number of roots with<br>non-collapsed<br>cortical cells |
|-------------|--------------------|-----------------------------------------------------|---------------------------------------------------------|
| C seedling  | Initial roots      | 12                                                  | 6                                                       |
|             | Initial roots      | 13                                                  | 5                                                       |
| DP seedling | Adventitious roots | 18                                                  | 0                                                       |
